# Supplementary material
Source: publisher figshare collection journal article supplement (https://frontiersin.figshare.com/ndownloader/files/14557022)
Supplement: Supplementary file 1 [file 14557022]

	Sphingomonas (Sphingomonadaceae)	Massilia (Oxalobacteraceae)	Frondihabitans (Microbacteriaceae)	Pseudomonas (Pseudomonadaceae)	Rathayibacter (Microbacteriaceae)	Naxibacter (Oxalobacteraceae)	Pseudomonas (Pseudomonadaceae)	Pantoea (Enterobacteriaceae)	Massilia (Oxalobacteraceae)	Arthrobacter (Micrococcaceae)	Curtobacterium (Microbacteriaceae)	Naxibacter (Oxalobacteraceae)	Janibacter (Intrasporangiaceae)	Sporosarcina (Planococcaceae)	Noviherbaspirillum (Oxalobacteraceae)	Unknown (Sphingomonadaceae)	Skermanella (Rhodospirillaceae)	Blastococcus (Geodermatophilaceae)	Massilia (Oxalobacteraceae)	Terrabacter (Intrasporangiaceae)	Bacillus (Bacillaceae_1)	Modestobacter (Geodermatophilaceae)	Unknown (GpIX)	Massilia (Oxalobacteraceae)	Duganella (Oxalobacteraceae)	Unknown (GpI)	Sporosarcina (Planococcaceae)	Unknown (Acetobacteraceae)	Exiguobacterium (Bacillales_Incertae_Sedis_XII)	Burkholderia (Burkholderiaceae)	Tumebacillus (Alicyclobacillaceae)	Unknown (Microbacteriaceae)	Gluconacetobacter (Acetobacteraceae)	Unknown (Acetobacteraceae)	Unknown (Enterobacteriaceae)	Pseudomonas (Pseudomonadaceae)	Phenylobacterium (Caulobacteraceae)	Unknown (GpI)	Unknown (Beijerinckiaceae)	Unknown (Beijerinckiaceae)	Actinomycetospora (Pseudonocardiaceae)	Erwinia (Enterobacteriaceae)	Rhizobacter (Pseudomonadaceae)	Unknown (Acetobacteraceae)	Aquisphaera (Planctomycetaceae)	Unknown (Acetobacteraceae)	Unknown (Acetobacteraceae)	Burkholderia (Burkholderiaceae)	Unknown (Acetobacteraceae)
ABG-9-29	6.19542564697813	2.64067322658084	0.925950352177698	0.6252143403593	0.484079457619965	0.411533489856755	0.448465982536207	0.445827947344818	0.526288020682196	2.88469148178437	0.809876803756562	1.75561241986968	0.459018123301765	1.01696256628063	0.561901495765953	0.768987258290026	0.439232859366344	0.838895190861846	0.91803624660353	1.30318938454639	0.960244809665761	0.581686759701374	0.613343181998048	0.836257155670457	0.931226422560477	NA	NA	NA	NA	NA	NA	NA	NA	NA	NA	NA	NA	NA	NA	NA	NA	NA	NA	NA	NA	NA	NA	NA	NA
AMA-9-29	2.24846782431052	0.550306435137896	1.25638406537283	NA	NA	NA	NA	5.63457609805924	NA	2.92134831460674	0.529877425944842	1.31767109295199	NA	1.11082737487232	NA	NA	NA	NA	0.764811031664964	0.944841675178754	0.528600612870276	NA	NA	0.68564862104188	NA	0.920582226762002	0.497957099080695	1.05847803881512	0.808222676200204	0.935903983656793	2.04928498467824	0.49923391215526	0.586057201225741	2.47063329928498	7.68258426966292	1.42109295199183	0.514555669050051	0.559244126659857	NA	NA	NA	NA	NA	NA	NA	NA	NA	NA	NA
BLA-9-29	1.6642153406	0.745471762738501	0.558096427779905	1.19879918602543	NA	NA	NA	NA	NA	1.46072169725787	NA	0.795841476437048	NA	0.42512038361574	NA	NA	NA	NA	NA	0.604436564382568	NA	NA	NA	NA	NA	NA	NA	NA	NA	NA	NA	NA	NA	NA	5.10950375758064	NA	NA	NA	0.523845022464892	1.09000060443656	0.507726714081357	7.17869159631697	0.384824612656902	1.17059214635424	0.427135172163681	0.97918723429976	0.491608405697822	0.386839401204844	0.783752745149397
CEM-9-29	2.26544321025596	0.879542228271209	0.510749147531867	2.95327157512696	0.71270726317484	0.696609152507647	NA	NA	0.567824267170098	1.41370680950081	1.17662554331123	1.97714068285259	NA	1.10930617143024	NA	NA	NA	NA	1.119550423673	NA	0.755147736751987	NA	NA	0.50782221831965	NA	NA	NA	NA	NA	NA	NA	NA	NA	NA	NA	NA	NA	NA	NA	NA	NA	NA	NA	NA	NA	NA	NA	NA	NA
DEL-9-29	8.21503263831675	2.55244312060333	1.48298371252931	1.47347740667976	0.972811965270296	NA	NA	1.27226059953102	0.495912288484695	3.37156980797262	0.866658216617023	1.5622029279422	NA	1.13917231763737	0.508587362950757	0.725648013182077	NA	0.513340515875531	0.712972938716015	1.32137651308701	0.773179542429812	NA	NA	0.646428797769187	NA	NA	NA	NA	NA	NA	NA	NA	NA	NA	NA	NA	NA	NA	NA	NA	NA	NA	NA	NA	NA	NA	NA	NA	NA
FAI-9-29	4.19956158423022	1.62180871227729	0.738384454370148	NA	0.51917656947901	NA	NA	0.670809091358594	NA	1.97287096402024	1.03670495937237	3.34910091803603	NA	0.964185057603877	NA	NA	NA	NA	0.987259571802944	0.590048291661859	NA	NA	NA	0.651030936330823	0.537306544921135	NA	NA	NA	NA	NA	NA	NA	NA	NA	NA	NA	NA	NA	NA	NA	NA	NA	NA	NA	NA	NA	NA	NA	NA
HAR-9-29	4.33934725816541	1.24734769970441	1.08422356591809	0.499184379331068	NA	NA	NA	NA	NA	2.44440901230177	0.50654336281015	1.06582610722039	0.425594544540248	1.68152772497026	NA	0.784958237768756	NA	NA	0.505316865563637	1.03884316779709	NA	NA	NA	0.450124489470521	NA	NA	0.55315025817767	NA	NA	NA	NA	NA	NA	NA	0.486919406865932	NA	NA	NA	0.489372401358959	NA	NA	NA	NA	NA	NA	NA	NA	NA	NA
JAM-9-29	5.39880679210647	2.06516750803121	NA	1.03533731069298	1.2308398347866	NA	NA	2.66544286369894	0.712253327214318	1.1317117944011	1.26663607159247	1.07939421753098	NA	NA	NA	NA	NA	NA	NA	NA	NA	NA	NA	NA	NA	NA	NA	NA	NA	NA	NA	NA	NA	NA	NA	NA	NA	NA	NA	NA	NA	2.98026617714548	NA	NA	NA	NA	NA	NA	NA
LIV-9-29	3.12315086088701	0.741820490987025	1.59332650204217	NA	0.489255148724906	NA	NA	0.555643752976663	0.513790067687512	4.98924793257227	1.71311463580078	4.13341222993549	0.59461097721139	0.506573915051451	NA	0.689864192007389	0.493584840306542	0.558530214031087	1.20221102916769	0.990056141667509	NA	NA	NA	0.725944955187692	NA	NA	NA	NA	NA	NA	NA	NA	NA	NA	NA	NA	NA	NA	NA	NA	NA	NA	NA	NA	NA	NA	NA	NA	NA
MAU-9-29	1.56741381727861	0.299461170202111	0.33351361096088	NA	NA	NA	NA	NA	NA	1.17881537567854	0.361556797468101	0.449692526490796	NA	0.356549085591811	NA	0.293451915950564	NA	0.244376339562927	0.283436492197985	0.380586102598001	NA	NA	NA	0.255393305690764	NA	NA	NA	NA	NA	NA	NA	NA	NA	NA	2.6310518198025	NA	NA	NA	0.729122849187749	NA	NA	45.1485287342507	NA	NA	NA	NA	NA	NA	NA
MPR-9-29	2.01878472023366	NA	NA	NA	NA	NA	NA	0.566977836320944	NA	2.77761869308745	0.664337666800298	1.52482675677224	NA	1.25565546074108	0.891987858656434	0.556955500830422	0.634270660328733	0.857625565546074	1.08813928182807	1.12250157493843	0.548364927552832	NA	NA	0.535479067636447	NA	NA	NA	NA	NA	NA	NA	NA	NA	NA	NA	NA	NA	NA	NA	NA	NA	NA	NA	NA	NA	NA	NA	NA	NA
OAK-9-29	1.03911980440098	0.477883974216493	0.97799511002445	NA	0.463991998221827	NA	NA	NA	NA	2.25883529673261	1.01689264280951	0.877972882862858	0.491775950211158	0.694598799733274	0.586241386974883	NA	NA	NA	NA	1.38086241386975	NA	NA	NA	NA	NA	NA	NA	NA	NA	NA	NA	NA	NA	NA	NA	NA	NA	NA	NA	NA	0.480662369415426	NA	NA	NA	NA	NA	NA	NA	NA
PET-9-29	1.02601956080458	NA	NA	NA	NA	NA	NA	NA	NA	1.06292673925078	NA	0.717844620778741	NA	0.479793319800701	0.564679830226979	NA	NA	0.381989296918251	0.437350064587562	0.640339546041705	NA	NA	NA	NA	NA	NA	NA	NA	NA	NA	NA	NA	NA	NA	NA	NA	NA	NA	NA	NA	NA	NA	NA	NA	NA	NA	NA	NA	NA
STR-9-29	3.15303973631203	0.99340780076909	0.460080571323933	0.461225050357077	NA	NA	NA	NA	NA	2.33702618568028	0.496703900384545	1.54161325764512	NA	1.2245925654642	NA	0.675242629555027	NA	NA	1.13761215894525	0.963651345907343	0.513871085881707	NA	NA	0.485259110053104	NA	NA	NA	NA	NA	NA	NA	NA	NA	NA	NA	NA	NA	NA	NA	NA	NA	NA	NA	NA	NA	NA	NA	NA	NA
WEG-9-29	4.18279309788744	0.723673601032092	0.63598613126915	NA	0.562409288824383	NA	NA	NA	NA	2.60240283825189	1.1641267537494	1.29011449766167	NA	1.50378971133688	NA	0.424326721496533	NA	0.493871956136107	0.656144170295114	1.34655700693437	0.511006289308176	NA	NA	0.764997581035317	NA	NA	0.527132720528947	NA	NA	NA	NA	NA	NA	NA	NA	NA	NA	NA	NA	NA	NA	NA	NA	NA	NA	NA	NA	NA	NA
WHT-9-29	6.18773224190856	2.71527815175831	1.25047121546664	2.15412784748775	0.720555764984652	0.709785125747213	0.841186924443966	0.522376003015779	NA	2.8843771877861	0.483601701761	1.3010932198826	NA	1.57789864828478	NA	0.716247509289676	NA	NA	0.651623673865044	1.2397005762292	0.637621842856374	NA	NA	0.567612687813022	NA	NA	0.599924605525338	NA	NA	NA	NA	NA	NA	NA	NA	NA	NA	NA	NA	NA	NA	0.786256664333028	NA	NA	NA	NA	NA	NA	NA
WIL-9-29	2.6275205027313	1.27988930687076	0.59238119946383	0.634179386287312	NA	NA	NA	1.89533157492685	NA	2.59004626626886	1.38510543232297	2.88984015796832	NA	1.33754197835142	NA	0.763897897118808	0.59238119946383	0.550583012640348	1.12278577708595	1.06369178881826	NA	NA	NA	0.626972802352229	NA	NA	NA	NA	NA	NA	NA	NA	NA	NA	NA	NA	NA	NA	NA	NA	NA	NA	NA	NA	NA	NA	NA	NA	NA
[truncated: 104 more columns]
